# Supplementary material
Source: PubMed Central journal article supplement (PMC2808236)
Supplement: E09-05-0437_1.pdf [file E09-05-0437_1.pdf]

## **SUPPLEMENTAL FIGURE LEGENDS**

**Supplemental Figure S1.** Importin- $\alpha 3$  is localized throughout the cytoplasm and nucleus. HA-tagged importin- $\alpha 3$  was transiently expressed in Cos7 cells and immunostained with anti-HA antibody. Nuclei were visualized with DAPI.

**Supplemental Figure S2.** Nuclear accumulation of Cby in HEK293T cells upon LMB treatment. HEK293T cells were transfected with an expression vector for Flag-Cby, treated with methanol (- LMB) or 40 nM LMB (+ LMB) for 5 h, and immunostained with anti-Flag antibody.

**Supplemental Figure S3.** Cby NLS mutations do not affect the interaction between Cby and 14-3-3. HEK293T cells were cotransfected with HA-14-3-3 $\zeta$  and Flag-tagged CbyWT or the indicated Cby NLS mutants. Total cell lysates were immunoprecipitated with anti-Flag antibody and analyzed with anti-HA antibody. IgG H and IgG L denote IgG heavy and light chains, respectively. Immunoblotting of the cell lysates with anti-HA and anti-Flag antibodies showed that the proteins were stably expressed.

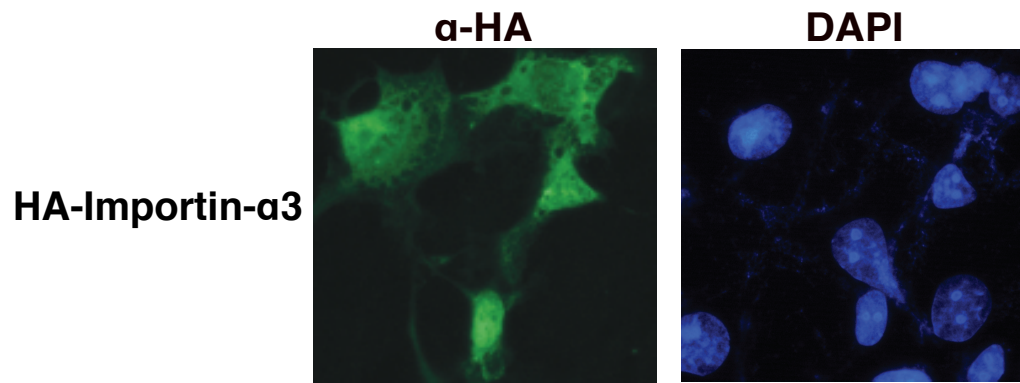

**Supplemental Figure S1**

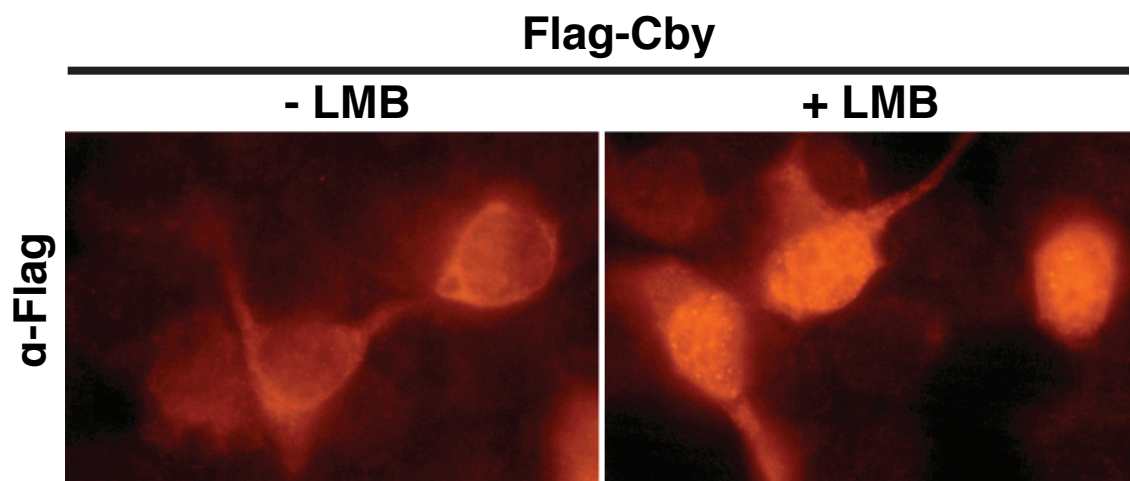

**Supplemental Figure S2**

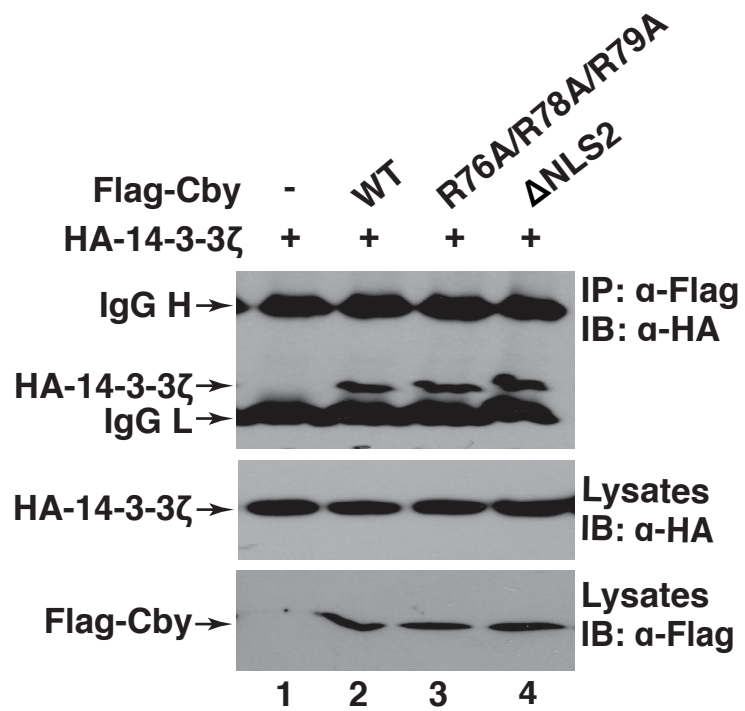

**Supplemental Figure S3**
